# Supplementary material for: Broadening symptom criteria improves early case identification in SARS-CoV-2 contacts
Source: PubMed Central journal article supplement (PMC8620106; doi:10.1183/13993003.02308-2021), 2022-07-07

**SUPPLEMENTARY MATERIALS:**

**S1: International Variation in Symptom Criteria within Case Definitions for suspected COVID-19 within the general community population (as of 16<sup>th</sup> July 2021):**

|                                                   |                                                                                                                                                       |
|---------------------------------------------------|-------------------------------------------------------------------------------------------------------------------------------------------------------|
| <b>World Health Organisation</b>                  | 1) Fever AND Cough                                                                                                                                    |
|                                                   | 2) AT LEAST 3 OF: Fever, Cough, Fatigue, Headache, Myalgia, Sore throat, Coryza, Anorexia/nausea/vomiting, Dyspnoea, Diarrhoea, Altered mental status |
|                                                   | 3) Loss or change in smell or taste AND Anorexia/Nausea/Vomiting AND Absence of any other identified cause                                            |
| <b>United States (Center for Disease Control)</b> | 1) Cough OR Dyspnoea OR Shortness of breath OR Loss or change in smell or taste                                                                       |
|                                                   | 2) AT LEAST 2 OF: Fever, Chills, Rigors, Myalgia, Headache, Sore throat, Diarrhoea, Fatigue, Coryza, Nausea/vomiting                                  |
| <b>France</b>                                     | Dyspnoea OR Cough OR Fever OR Loss or change in smell or taste<br>Fatigue OR Sore throat OR Headache OR Myalgia                                       |
| <b>Spain</b>                                      | Dyspnoea OR Cough OR Fever OR Loss or change in smell or taste<br>Diarrhoea OR Sore throat OR Headache OR Myalgia                                     |
| <b>United Kingdom</b>                             | Cough OR Fever OR Loss or change in smell or taste                                                                                                    |

Exact wordings of criteria can be found at: World Health Organization,[8] United States (Centers for Disease Control),[9] France,[10] Spain,[11] United Kingdom.[12]

## SUPPLEMENTARY METHODS:

**S2: Precise Wording of Symptom Items within Symptom Diary.** The order in which items were asked about within the symptom diary is given in the right-hand column.

| Type              | Referred to in main text as | Wording within symptom diary                          | Order within symptom diary |
|-------------------|-----------------------------|-------------------------------------------------------|----------------------------|
|                   |                             | In the last 24 hours, have you...                     |                            |
| Canonical Symptom | fever                       | felt feverish?                                        | 1                          |
|                   | persistent cough            | had a persistent cough lasting for more than 4 hours? | 2                          |
|                   | productive cough            | coughed up phlegm or mucous?                          | 3                          |
|                   | anosmia                     | had loss or change of smell or taste?                 | 17                         |
| Lower Respiratory | breathlessness              | felt unusually dyspnoea?                              | 5                          |
|                   | wheeze                      | had a wheeze?                                         | 20                         |
|                   | cough blood                 | coughed blood?                                        | 4                          |
|                   | chest pain                  | had chest pain?                                       | 11                         |
| Upper Respiratory | rhinitis                    | had a runny or blocked nose?                          | 14                         |
|                   | sore throat                 | had a sore throat?                                    | 13                         |
|                   | conjunctivitis              | had red or irritated eyes?                            | 16                         |
| Gastrointestinal  | abdominal pain              | had unusual tummy pains?                              | 19                         |
|                   | appetite loss               | had loss of appetite?                                 | 18                         |
|                   | nausea                      | felt sick or vomited?                                 | 7                          |
|                   | diarrhoea                   | had diarrhoea?                                        | 10                         |
| Systemic          | headache                    | had a headache?                                       | 12                         |
|                   | muscle aches                | had unusual muscle aches?                             | 6                          |
|                   | fatigue                     | felt tired or generally unwell?                       | 8                          |
|                   | confusion                   | been confused?                                        | 9                          |
|                   | rash                        | had a rash?                                           | 15                         |

### **S3: Describing symptom onset using time-to-event analysis**

We aimed to identify symptoms with a high probability of occurring due to COVID-19 by 10 days post index symptom onset. Index symptom onset (ISO) was defined as the onset date of the first of any of the 20 symptoms. We used time-to-event analysis to describe the onset of COVID-19 related symptoms by comparing symptom onset in ‘infected’ and ‘uninfected’ contacts in cohort A (Figure 1).

Participants were excluded from this analysis if the date of index symptom onset was unknown, or if the contact reported symptoms which occurred more than 3 days prior to index symptom onset. Rarely, symptoms were reported at enrolment without an onset date. We imputed onset dates for these symptoms using the median number of days pre-enrolment (maximum 9 participants [5.4%] for muscle aches). Participants with incomplete symptom diaries were right-censored on the day their symptom diary ended.

We used symptoms reported by ‘uninfected’ contacts to define a baseline time-dependent hazard and calculated the difference in hazards between ‘infected’ and ‘uninfected’ contacts to represent the COVID-19-related time-dependent hazard of onset of each symptom.

$$h(t) = h^+(t) - h^-(t)$$

Cumulative COVID-19-related hazards  $H(t)$  were calculated by adding up the daily  $h(t)$  up to time  $t$ . The probability of an ‘infected’ individual experiencing a symptom as a result of their infection by a particular time  $t$ , was estimated by calculating 1 minus the survival probability  $S(t)$ :

$$1 - S(t) = 1 - (\exp[-H(t)]).$$

We selected symptoms where this probability was more than 15% at  $t = 10$  days as candidate symptoms for further evaluation. Bootstrap 90% confidence intervals were calculated for  $h(t)$  and  $H(t)$ .

#### **S4: Spiegelhalter Knill-Jones Method**

Likelihood ratios (LRs) have clinical value as they quantify how much a diagnostic test result (or symptom) will raise or lower the pre-test probability of the target condition. Bayes's theorem (by which LRs are calculated) assumes that diagnostic tests act independently. However, symptoms often co-occur and this dependency must be accounted for to avoid overoptimistic evaluations of diagnostic performance. Spiegelhalter and Knill-Jones combined Bayes's theorem with logistic regression to produce LRs which are adjusted for dependency.

We used Spiegelhalter Knill-Jones models to study the predictive power of symptom combinations and measure the diagnostic usefulness of each symptom within the combinations. The analysis was performed using Cohort B as the training dataset and Cohort C as the test dataset (Figure 1).

Symptoms were considered as diagnostic tests based on their occurrence by each study day for the day of recruitment (day 0) and the first 7 days thereafter. Diagnostic performance is assessed compared to a composite serial PCR and serology reference standard in the training dataset and a serial PCR reference standard in the test dataset (described in the main text).

A series of 8 Spiegelhalter Knill-Jones models were created, one for each study day, using 3 predictors (fever, cough, anosmia) to evaluate the canonical symptoms (CS). Nine further sets of 8 models were created using 4 predictors (fever, cough, anosmia, and the candidate symptom) to evaluate the effect of adding one of the 9 candidate variables to the 3 CS at each study day. Adjusted LRs were calculated for each of the canonical symptoms (fever, cough and anosmia) when used together, and for each candidate symptom when added to the canonical symptoms.

In brief, rather than including sets of (0,1) indicator variables for each symptom in a logistic regression, the indicator variables take the value of the crude positive and negative likelihood ratios  $LR^{crude}$  in a logistic regression equation of the form:

$$\log(\text{posttest odds}) = \log(\text{pretest odds}) + \gamma_1 \log LR_1^{crude} + \gamma_2 \log LR_2^{crude}$$

using  $\log(\text{pretest odds})$  as an offset term and not including an intercept term. Missing symptom data are entered as having log likelihood ratios of zero (making the assumption that a missing value is not in itself diagnostic). The parameter  $\gamma_i$  is called the shrinkage factor for symptom  $i$ . A value of  $\gamma_i$  of 1 indicates no dependency between symptoms in the model. A value of zero indicates that the symptom adds no additional diagnostic information as there is total dependency with the other symptoms. Adjusted LRs for each symptom when used in combination with the other symptoms in the model are calculated using the shrinkage factor and the crude LR for that symptom when used as on its own.

The formula for calculating adjusted LRs is given by

$$LR_i^{adj} = \exp(\gamma_i \times \log(LR_i^{crude})).$$

We calculated the area under the receiver operating characteristic curve (AUC-ROC) for each predictive model in the training dataset and test dataset (cohort B & C respectively, Figure 1) and compared to the AUC-ROCs for predictive models containing only fever, cough and anosmia. Candidate symptoms whose addition yielded consistent improvements in AUC-ROC across multiple early time-points were considered 'early predictors' and were evaluated within simple diagnostic decision tools.

**Worked example of a Spiegelhalter Knill-Jones models.**

A Spiegelhalter Knill-Jones model using fever, cough, anosmia and headache as predictor variables at study day 0 is presented as a worked example to illustrate how the adjusted likelihood ratios (LRs) are calculated and interpreted. The full output of every model is available on request.

A 2x2 table is constructed for each symptom (raw counts from Table 1 in main text):

|                 | infected | uninfected      |                 |     |
|-----------------|----------|-----------------|-----------------|-----|
| fever           |          |                 |                 |     |
| symptom present | 13       | 2               | Total (TP + FP) | 15  |
| symptom absent  | 60       | 93              | Total (TN + FN) | 153 |
| cough           |          |                 |                 |     |
| symptom present | 25       | 10              | Total (TP + FP) | 35  |
| symptom absent  | 48       | 85              | Total (TN + FN) | 133 |
| Anosmia         |          |                 |                 |     |
| symptom present | 15       | 1               | Total (TP + FP) | 16  |
| symptom absent  | 58       | 94              | Total (TN + FN) | 152 |
| Headache        |          |                 |                 |     |
| symptom present | 29       | 16              | Total (TP + FP) | 45  |
| symptom absent  | 44       | 79              | Total (TN + FN) | 123 |
|                 |          | Total (TP + FN) | Total (TN + FN) |     |
|                 |          | 73              | 95              |     |

Crude positive and negative likelihood ratios (LRs) (S11) are calculated for each symptom  $i$  using the equations:

$$positive LR_i^{crude} = \frac{\left(\frac{TP}{TP+FN}\right)}{1-\left(\frac{TN}{TN+FP}\right)} \qquad negative LR_i^{crude} = \frac{1-\left(\frac{TP}{TP+FN}\right)}{\left(\frac{TN}{TN+FP}\right)}$$

|          | Crude Positive LR | Crude Negative LR |
|----------|-------------------|-------------------|
| Fever    | 8.46              | 0.84              |
| Cough    | 3.25              | 0.73              |
| Anosmia  | 19.52             | 0.80              |
| Headache | 2.36              | 0.72              |

The log of the odds of infection at study day 1 is used as the offset term:

$$\log\left(\frac{73}{95}\right) = \log(0.77)$$

Instead of 1 and 0, the indicator variables take the value of the crude positive and negative likelihood ratios for each of the CS with missing data entered as having log likelihood ratios of zero. The model fitted for the example is:

$$\log(\text{posttest odds}) = \log(0.77) + 0.547\log(LR_{\text{fever}}^{\text{crude}}) + 0.204\log(LR_{\text{cough}}^{\text{crude}}) + 0.785\log(LR_{\text{anosmia}}^{\text{crude}}) + 0.366\log(LR_{\text{headache}}^{\text{crude}})$$

The shrinkage factor  $\gamma_i$  is used to calculate the adjusted LRs (Figure 2) for symptom  $i$ . For example, the positive adjusted LR for fever when used in combination with cough, anosmia & sore throat on day 0 is calculated as follows:

$$\text{positive } LR_{\text{fever}}^{\text{adj}} = \exp(y_{\text{fever}} \times \log(\text{positive } LR_{\text{fever}}^{\text{crude}})) = \exp(0.547 \times \log(8.46)) = 3.22$$

Note how the magnitude of the LR has been shrunk to account for the symptom's dependency with other symptoms in the model.

| Symptom  | Crude Positive LR | Crude Negative LR | Shrinkage Factor | Adjusted Positive LR | Adjusted Negative LR |
|----------|-------------------|-------------------|------------------|----------------------|----------------------|
| Fever    | 8.46              | 0.84              | 0.547            | 3.22                 | 0.91                 |
| Cough    | 3.25              | 0.73              | 0.204            | 1.27                 | 0.94                 |
| Anosmia  | 19.52             | 0.80              | 0.785            | 10.29                | 0.84                 |
| Headache | 2.36              | 0.72              | 0.366            | 1.37                 | 0.89                 |

Estimates of overall LRs for combinations of test results are obtained by multiplying these values. On study day 0, a contact with fever and headache but without cough or anosmia has  $3.22 \times 0.94 \times 0.84 \times 1.37 = 3.5$  times the odds of being infected compared to a contact where symptoms are unknown.

We then used AUC-ROC to evaluate model discrimination in training and test datasets (cohorts B & C, Figure 1) and compare models using the CS to those with an additional symptom (Figure3).

## SUPPLEMENTARY RESULTS:

### **S5: Recruitment cascade.**

Early in the study, contacts were referred to our study through the Royal College of General Practitioners Research and Surveillance Centre. Later in the study, contacts were referred either directly through National Test And Trace or, in the case of most household-exposed contacts, through their index case, which PHE had identified. In total, 53011 referrals were received via these three pathways. If contacts were identified via PHE, PHE would initially ascertain whether participants consented to being contacted to take part in a research study. Consenting Contacts would then be contacted by Imperial College London, of which a subset would agree to take part. PHE and Imperial strove to contact all eligible contacts, but were limited by staff resources. The potentially eligible contacts PHE and Imperial attempted to call were non-biased in that the staff systematically worked down their list of participants, which was organised at random. Where referrals concerned index cases, multiple contacts may have been recruited following a single referral.

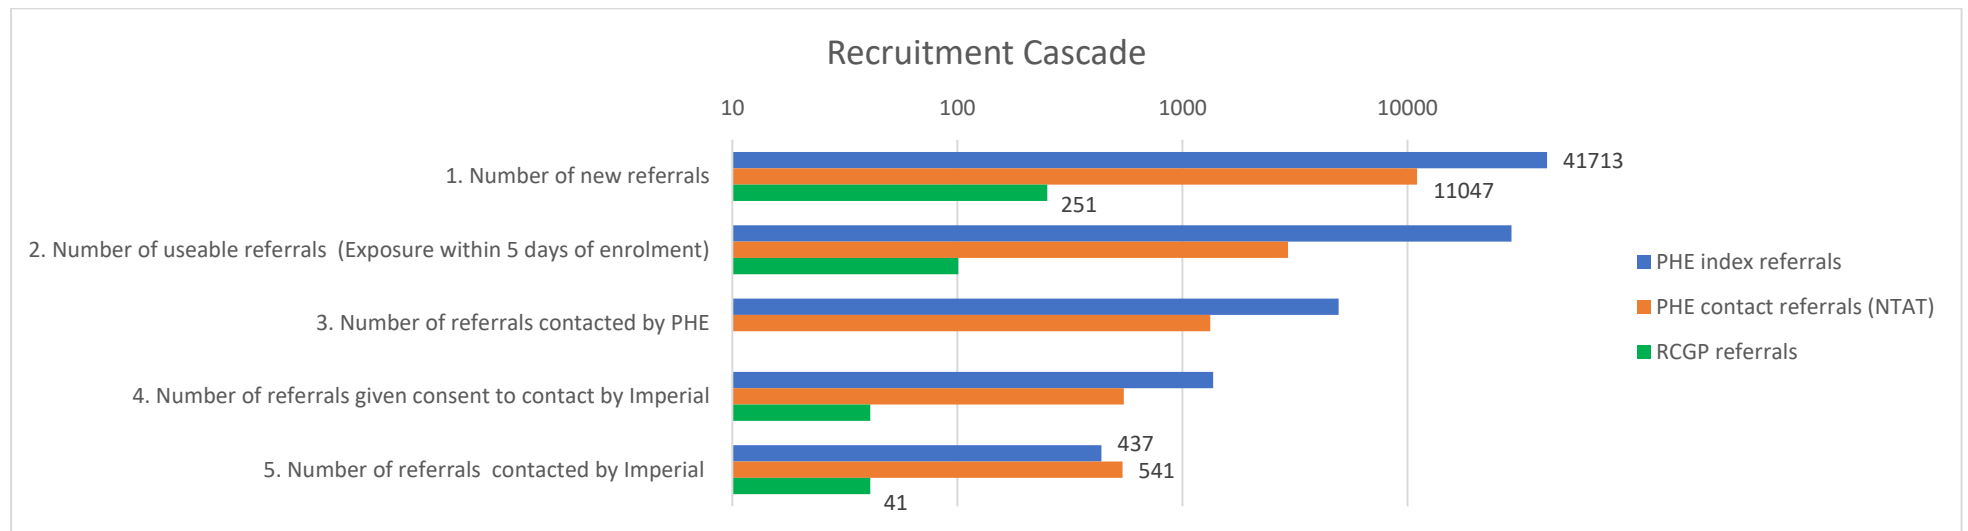



**S6: Baseline Demographics for INSTINCT and ATACCC cohorts.** Demographics are shown for cohorts B and C in Figure 1. Cohorts were compared using chi-squared tests for proportions and Wilcoxon rank sum to compare non-normally distributed populations.

BMI = Body Mass Index, IQR = Inter-quartile range

|                         |                            | <b>INSTINCT</b>                         | <b>ATACCC</b>                           | <b>p-value</b>   |
|-------------------------|----------------------------|-----------------------------------------|-----------------------------------------|------------------|
| <b>N</b>                |                            | <b>168</b>                              | <b>361</b>                              |                  |
| Contact Type            | Household (n/N, %)         | <b>168/168,</b><br>100%                 | <b>227/361,</b> 62.9%                   | <b>X</b>         |
|                         | Non-household (n/N, %)     | <b>0/168,</b> 0%                        | <b>134/361,</b> 37.1%                   | <b>X</b>         |
| Age                     | ( <b>median,</b> IQR)      | <b>34,</b> 21 – 47                      | <b>38,</b> 28 – 52                      | <b>&lt;0.001</b> |
| Sex                     | Female (n/N, %)            | <b>79/168,</b> 47.0%                    | <b>182/361,</b> 50.4%                   | <b>0.33</b>      |
|                         | Male (n/N, %)              | <b>88/168,</b> 52.4%                    | <b>166/361,</b> 46.0%                   |                  |
| BMI                     | ( <b>median,</b> IQR)      | <b>25.2,</b> 22.8 –<br>27.4             | <b>25.2,</b> 22.3 –<br>29.1             | <b>0.93</b>      |
| Ethnicity               | White (n/N, %)             | <b>138/168,</b><br>82.1%                | <b>299/361,</b> 82.8%                   | <b>0.93</b>      |
|                         | Non-white (n/N, %)         | <b>25/168,</b> 14.9%                    | <b>51/361,</b> 14.1%                    |                  |
| Smoking History         | Current smoker (n/N, %)    | <b>20/168,</b> 11.9%                    | <b>57/361,</b> 15.8%                    | <b>0.67</b>      |
|                         | Vape/E-cigarettes (n/N, %) | <b>4/168,</b> 2.4%                      | <b>8/361,</b> 2.2%                      |                  |
|                         | Ex-smoker (n/N, %)         | <b>17/168,</b> 10.1%                    | <b>30/361,</b> 8.3%                     |                  |
|                         | Non-smoker (n/N, %)        | <b>118/168,</b><br>70.2%                | <b>257/361,</b> 71.2%                   |                  |
| Number of Comorbidities | None (n/N, %)              | <b>141/166,</b><br>84.9%<br>(2 missing) | <b>235/353,</b><br>66.6%<br>(8 missing) | <b>0.002</b>     |
|                         | One or more (n/N, %)       | <b>25/166,</b><br>15.1%<br>(2 missing)  | <b>118/353,</b><br>33.4%<br>(8 missing) |                  |

**S7: Cumulative COVID-19 related hazards for the onset of each symptom over time in days post index symptom onset.** Cumulative COVID-19 related hazards  $H(t)$  were calculated by adding up the daily hazards  $h(t)$  up to time  $t$ . As  $H(t)$  is conditional on not having experienced the symptom before  $t$ , for a population it may sum over 1. The probability of an 'infected' individual experiencing a symptom as a result of their infection by a particular time  $t$ , was estimated by the formula:  $1 - S(t) = 1 - (\exp[-H(t)])$ . Symptoms which had  $1 - S(t)$  of more than 0.15 at  $t = 10days$ , corresponding to  $H(10days)$  of more than  $-\ln(0.85) = 0.163$  were selected as candidate symptoms for evaluation. ISO = Index Symptom Onset.

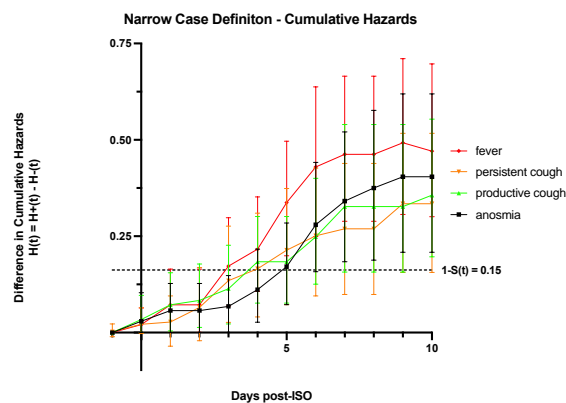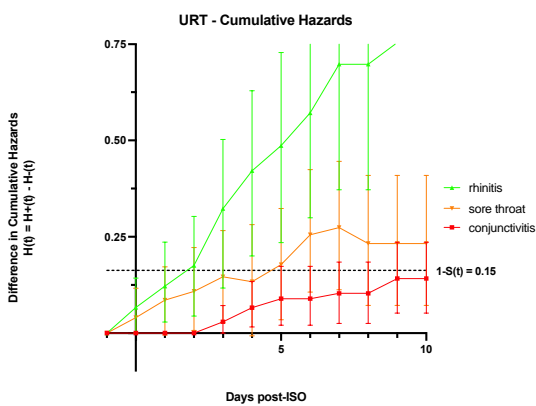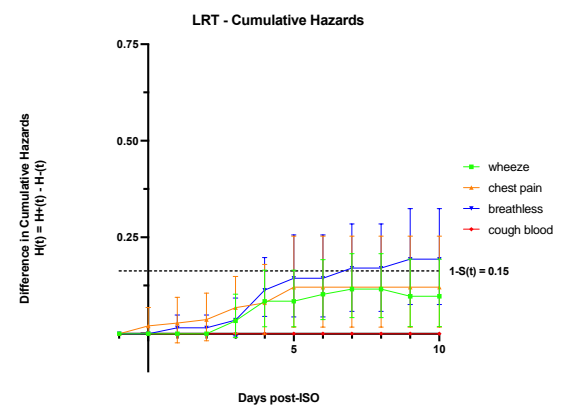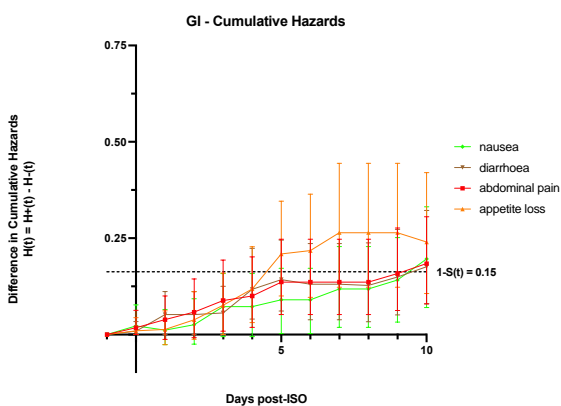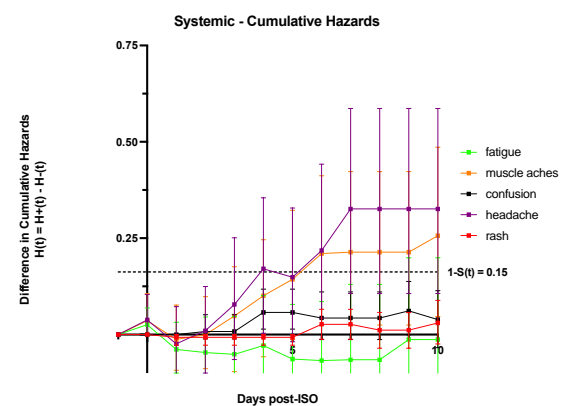

**S8: Life table for time-to-event analysis describing time from onset of any index symptom to onset of individual symptoms in the contact.** This analysis was performed using Cohort A (Figure 1). For each 2 day time interval, the number of participants at risk of onset of each symptom at the start of each time period is given. The numbers of participants reporting symptom onset, and participants whose study diary ended within the time interval are given in brackets. At enrolment, some contacts reported symptom onset prior to any symptom onset in the index. These events are shown in time periods -4 to -2 and -2 to 0 (days post index symptom onset). As prospective study diaries always started after index symptom onset, the number of participants whose symptom diary ended within these time intervals is not applicable (NA). Rarely, symptoms were reported at enrolment without an onset date. We imputed onset dates for these symptoms using the median number of days pre-enrolment (maximum 9 participants [5.4%] for muscle aches). URT = Upper Respiratory Tract, LRT = Lower Respiratory Tract, GI = Gastrointestinal

| Infection Status  | Group              | Symptom            | Time Period (Days post index symptom onset) |           |           |           |           |           |          |           |           |
|-------------------|--------------------|--------------------|---------------------------------------------|-----------|-----------|-----------|-----------|-----------|----------|-----------|-----------|
|                   |                    |                    | -4 to -2                                    | -2 to 0   | 0 to 2    | 2 to 4    | 4 to 6    | 6 to 8    | 8 to 10  | 10 to 12  |           |
| Current Infection | Canonical Symptoms | fever              |                                             | 65 (2,NA) | 63 (6,0)  | 57 (10,0) | 47 (7,0)  | 40 (6,1)  | 33 (1,1) | 31 (0,4)  |           |
|                   |                    | persistent cough   |                                             | 65 (1,NA) | 64 (1,0)  | 63 (4,3)  | 56 (8,3)  | 45 (4,3)  | 38 (3,4) | 31 (3,1)  |           |
|                   |                    | productive cough   | 65 (1,NA)                                   | 64 (2,NA) | 62 (6,1)  | 55 (5,0)  | 50 (4,0)  | 46 (8,0)  | 38 (1,0) | 37 (2,6)  |           |
|                   |                    | anosmia            | 65 (1,NA)                                   | 64 (1,NA) | 63 (5,1)  | 57 (4,0)  | 53 (5,0)  | 48 (9,0)  | 39 (4,1) | 34 (1,5)  |           |
|                   | URT                | rhinitis           | 65 (2,NA)                                   | 63 (2,NA) | 61 (10,1) | 50 (12,0) | 38 (8,0)  | 30 (8,0)  | 22 (3,1) | 18 (1,2)  |           |
|                   |                    | sore throat        | 65 (1,NA)                                   | 64 (0,NA) | 64 (8,3)  | 53 (5,0)  | 48 (4,4)  | 40 (4,0)  | 36 (0,5) | 31 (0,6)  |           |
|                   |                    | conjunctivitis     |                                             |           | 65 (0,1)  | 64 (2,0)  | 62 (4,2)  | 56 (1,2)  | 53 (2,3) | 48 (1,9)  |           |
|                   | LRT                | dyspnoea           | 65 (2,NA)                                   | 63 (0,NA) | 63 (1,1)  | 61 (2,0)  | 59 (7,3)  | 49 (2,1)  | 46 (1,2) | 43 (1,8)  |           |
|                   |                    | wheeze             | 65 (1,NA)                                   | 64 (1,NA) | 63 (0,1)  | 62 (3,0)  | 59 (3,0)  | 56 (2,2)  | 52 (1,4) | 47 (0,9)  |           |
|                   |                    | chest pain         | 65 (1,1)                                    | 63 (0,NA) | 63 (4,0)  | 59 (4,0)  | 55 (4,0)  | 51 (0,2)  | 49 (1,3) | 45 (0,9)  |           |
|                   |                    | cough blood        |                                             |           | 65 (0,1)  | 64 (0,0)  | 64 (0,0)  | 64 (0,3)  | 61 (0,4) | 57 (1,10) |           |
|                   | GI                 | diarrhoea          | 65 (1,NA)                                   | 64 (0,NA) | 64 (2,4)  | 57 (1,1)  | 55 (6,0)  | 49 (0,1)  | 48 (2,3) | 43 (2,8)  |           |
|                   |                    | appetite loss      | 65 (1,1)                                    | 63 (1,NA) | 62 (2,4)  | 56 (4,3)  | 49 (6,1)  | 42 (4,2)  | 36 (0,2) | 34 (0,9)  |           |
|                   |                    | abdominal pain     | 65 (1,NA)                                   | 64 (0,NA) | 64 (4,1)  | 59 (5,0)  | 54 (3,0)  | 51 (0,1)  | 50 (1,4) | 45 (1,7)  |           |
|                   |                    | nausea             | 65 (0,1)                                    | 64 (0,NA) | 64 (2,2)  | 60 (5,0)  | 55 (1,3)  | 51 (2,2)  | 47 (3,2) | 42 (2,8)  |           |
|                   | Systemic           | muscle aches       | 65 (2,NA)                                   | 63 (0,NA) | 63 (4,7)  | 52 (6,7)  | 39 (4,4)  | 31 (3,0)  | 28 (1,1) | 26 (1,6)  |           |
|                   |                    | headache           | 65 (1,NA)                                   | 64 (3,2)  | 59 (4,7)  | 48 (6,8)  | 34 (4,6)  | 24 (5,0)  | 19 (1,1) | 17 (0,1)  |           |
|                   |                    | fatigue            | 65 (2,2)                                    | 61 (0,NA) | 61 (2,11) | 48 (3,11) | 34 (2,5)  | 27 (2,2)  | 23 (1,2) | 20 (1,4)  |           |
|                   |                    | confusion          |                                             |           | 65 (0,1)  | 64 (2,0)  | 62 (3,0)  | 59 (0,2)  | 57 (1,4) | 52 (0,9)  |           |
|                   |                    | rash               |                                             |           | 65 (0,1)  | 64 (0,0)  | 64 (0,0)  | 64 (2,3)  | 59 (0,3) | 56 (1,10) |           |
|                   | Uninfected         | Canonical Symptoms | fever                                       |           |           | 81 (1,2)  | 77 (1,2)  | 74 (0,14) | 60 (1,5) | 54 (0,8)  | 46 (1,10) |
|                   |                    |                    | persistent cough                            |           | 81 (1,NA) | 80 (2,3)  | 75 (2,2)  | 71 (1,13) | 57 (1,5) | 51 (0,9)  | 42 (0,10) |
|                   |                    |                    | productive cough                            |           |           | 81 (1,2)  | 77 (3,2)  | 72 (1,14) | 57 (0,5) | 52 (0,9)  | 43 (0,11) |
|                   |                    |                    | anosmia                                     |           |           | 81 (0,3)  | 78 (1,2)  | 75 (0,14) | 61 (0,5) | 56 (1,9)  | 46 (0,11) |
|                   |                    | URT                | rhinitis                                    |           |           | 81 (4,3)  | 74 (1,2)  | 71 (5,14) | 52 (1,5) | 46 (0,9)  | 37 (0,9)  |
|                   |                    |                    | sore throat                                 |           | 81 (1,NA) | 80 (2,3)  | 75 (2,2)  | 71 (4,14) | 53 (0,5) | 48 (2,8)  | 38 (0,9)  |
|                   |                    |                    | conjunctivitis                              |           |           | 81 (0,3)  | 78 (0,2)  | 76 (1,15) | 60 (0,5) | 55 (0,8)  | 47 (0,11) |
|                   |                    | LRT                | dyspnoea                                    |           |           | 81 (0,4)  | 77 (2,2)  | 73 (2,15) | 56 (2,5) | 49 (0,6)  | 43 (0,10) |
| wheeze            |                    |                    |                                             |           | 81 (0,3)  | 78 (1,2)  | 75 (0,14) | 61 (0,5)  | 56 (1,9) | 46 (0,12) |           |
| chest pain        |                    |                    |                                             |           | 81 (2,3)  | 76 (1,2)  | 73 (2,14) | 57 (0,6)  | 51 (0,8) | 43 (0,9)  |           |
| cough blood       |                    |                    |                                             |           | 81 (0,3)  | 78 (0,2)  | 76 (0,14) | 62 (0,5)  | 57 (0,9) | 48 (0,12) |           |
| GI                |                    | diarrhoea          |                                             |           | 81 (0,3)  | 78 (1,2)  | 75 (2,14) | 59 (1,5)  | 53 (1,9) | 43 (0,11) |           |
|                   |                    | appetite loss      |                                             |           | 81 (1,3)  | 77 (1,2)  | 74 (1,14) | 60 (1,6)  | 53 (0,8) | 45 (1,11) |           |
|                   |                    | abdominal pain     |                                             |           | 81 (1,3)  | 77 (1,2)  | 74 (1,14) | 59 (0,5)  | 54 (0,8) | 46 (0,11) |           |
|                   |                    | nausea             |                                             |           | 81 (1,3)  | 77 (1,2)  | 74 (0,15) | 59 (0,5)  | 54 (0,8) | 46 (0,11) |           |
| Systemic          |                    | muscle aches       |                                             |           | 81 (5,5)  | 71 (3,2)  | 65 (3,15) | 51 (3,6)  | 45 (0,6) | 38 (0,8)  |           |
|                   |                    | headache           |                                             |           | 81 (6,4)  | 71 (3,2)  | 66 (3,15) | 48 (3,6)  | 39 (0,6) | 33 (0,8)  |           |
|                   |                    | fatigue            |                                             |           | 81 (5,3)  | 73 (6,3)  | 64 (4,14) | 46 (4,5)  | 37 (0,6) | 31 (0,7)  |           |
|                   |                    | confusion          |                                             |           | 81 (0,3)  | 78 (2,2)  | 74 (0,14) | 60 (2,5)  | 53 (0,8) | 45 (1,11) |           |
|                   |                    | rash               |                                             |           | 81 (1,3)  | 77 (0,2)  | 75 (0,14) | 61 (0,5)  | 56 (1,8) | 47 (0,11) |           |

**S9: Number of participants who had experienced a particular symptom by study day.**

Symptoms were considered as a series of binary tests based on their occurrence by each study day. Contacts were defined as infected or uninfected based on a composite PCR and serology reference standard (see main text). These raw counts were used to calculate diagnostic sensitivity and specificity of individual symptoms (S10) as well as crude likelihood ratios (S11) which were used in the Spiegelhalter Knill-Jones analysis. TP = True-positive, FN = False-negative, TN = True-negative, FP = False-positive.

| Infection Status |     |         | fever | cough | anosmia | muscle aches | headache | sore throat | rhinitis | breathless | appetite loss | abdominal pain | nausea | diarrhoea |
|------------------|-----|---------|-------|-------|---------|--------------|----------|-------------|----------|------------|---------------|----------------|--------|-----------|
|                  | Day | TP + FN | TP    | TP    | TP      | TP           | TP       | TP          | TP       | TP         | TP            | TP             | TP     | TP        |
| Infected         | 0   | 73      | 13    | 25    | 15      | 25           | 29       | 14          | 26       | 5          | 15            | 9              | 7      | 9         |
|                  | 1   | 72      | 20    | 31    | 15      | 34           | 39       | 20          | 37       | 11         | 20            | 12             | 10     | 12        |
|                  | 2   | 72      | 24    | 33    | 21      | 39           | 45       | 25          | 40       | 15         | 23            | 14             | 14     | 15        |
|                  | 3   | 71      | 28    | 34    | 26      | 40           | 47       | 27          | 43       | 18         | 26            | 14             | 14     | 15        |
|                  | 4   | 71      | 29    | 39    | 28      | 42           | 49       | 29          | 46       | 20         | 28            | 14             | 16     | 18        |
|                  | 5   | 69      | 28    | 38    | 28      | 41           | 48       | 30          | 48       | 20         | 28            | 14             | 16     | 20        |
|                  | 6   | 65      | 29    | 40    | 28      | 38           | 46       | 30          | 46       | 20         | 27            | 14             | 16     | 22        |
|                  | 7   | 57      | 25    | 33    | 25      | 35           | 39       | 26          | 40       | 16         | 23            | 12             | 15     | 18        |
| Uninfected       | Day | TN + FP | FP    | FP    | FP      | FP           | FP       | FP          | FP       | FP         | FP            | FP             | FP     | FP        |
|                  | 0   | 95      | 2     | 10    | 1       | 14           | 16       | 5           | 7        | 6          | 4             | 5              | 4      | 3         |
|                  | 1   | 62      | 3     | 9     | 2       | 11           | 16       | 7           | 10       | 5          | 4             | 4              | 4      | 3         |
|                  | 2   | 62      | 4     | 10    | 2       | 13           | 18       | 10          | 11       | 5          | 5             | 4              | 4      | 3         |
|                  | 3   | 61      | 4     | 9     | 2       | 15           | 19       | 10          | 11       | 7          | 5             | 5              | 4      | 5         |
|                  | 4   | 61      | 4     | 10    | 2       | 15           | 20       | 11          | 11       | 8          | 5             | 5              | 4      | 6         |
|                  | 5   | 58      | 4     | 10    | 2       | 14           | 19       | 11          | 11       | 8          | 5             | 5              | 4      | 6         |
|                  | 6   | 57      | 3     | 10    | 2       | 13           | 18       | 11          | 11       | 7          | 4             | 4              | 3      | 6         |
|                  | 7   | 55      | 2     | 9     | 2       | 12           | 17       | 12          | 11       | 6          | 5             | 3              | 2      | 5         |

**S10: Sensitivity and specificity, of individual symptoms by study day.** Symptoms were considered as a series of binary tests based on their presence by each study day. Raw counts are given in S9. Diagnostic sensitivity [A] and specificity [B]) were calculated compared to a composite PCR and serology reference standard (described in the main text) in cohort B (Figure 1). The Clopper-Pearson interval was used to calculate 95% confidence intervals.

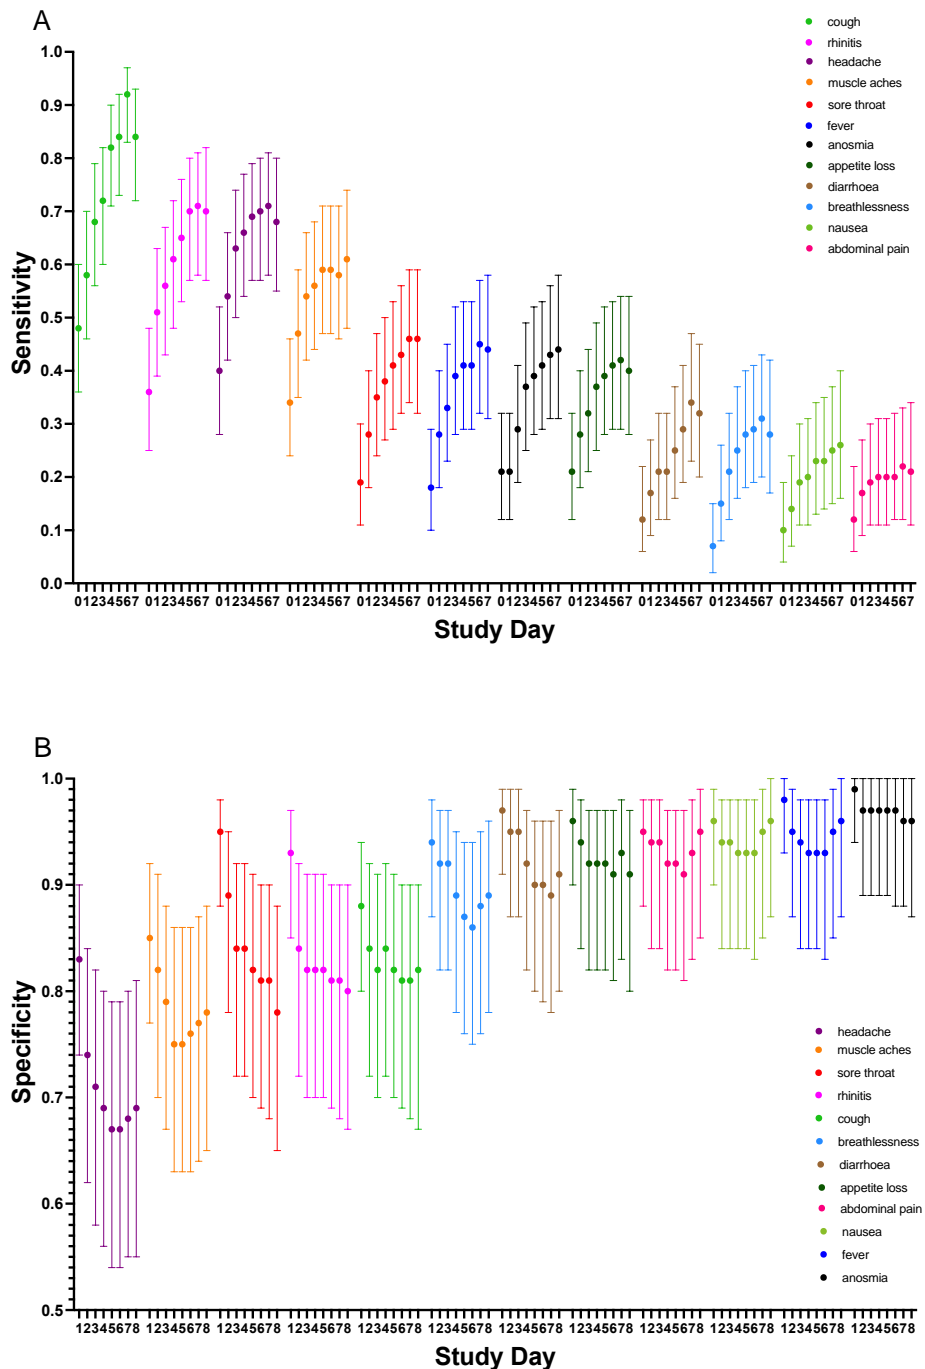

**S11: Positive and Negative Crude Likelihood Ratios for individual symptoms.** Symptoms were considered as a series of binary tests based on their presence by each study day. Raw counts are given in S9. Crude LR were calculated compared to a composite PCR and serology reference standard (described in the main text) in cohort B (Figure 1). The Koopman method was used to calculate 95% confidence intervals. LR = likelihood ratio.

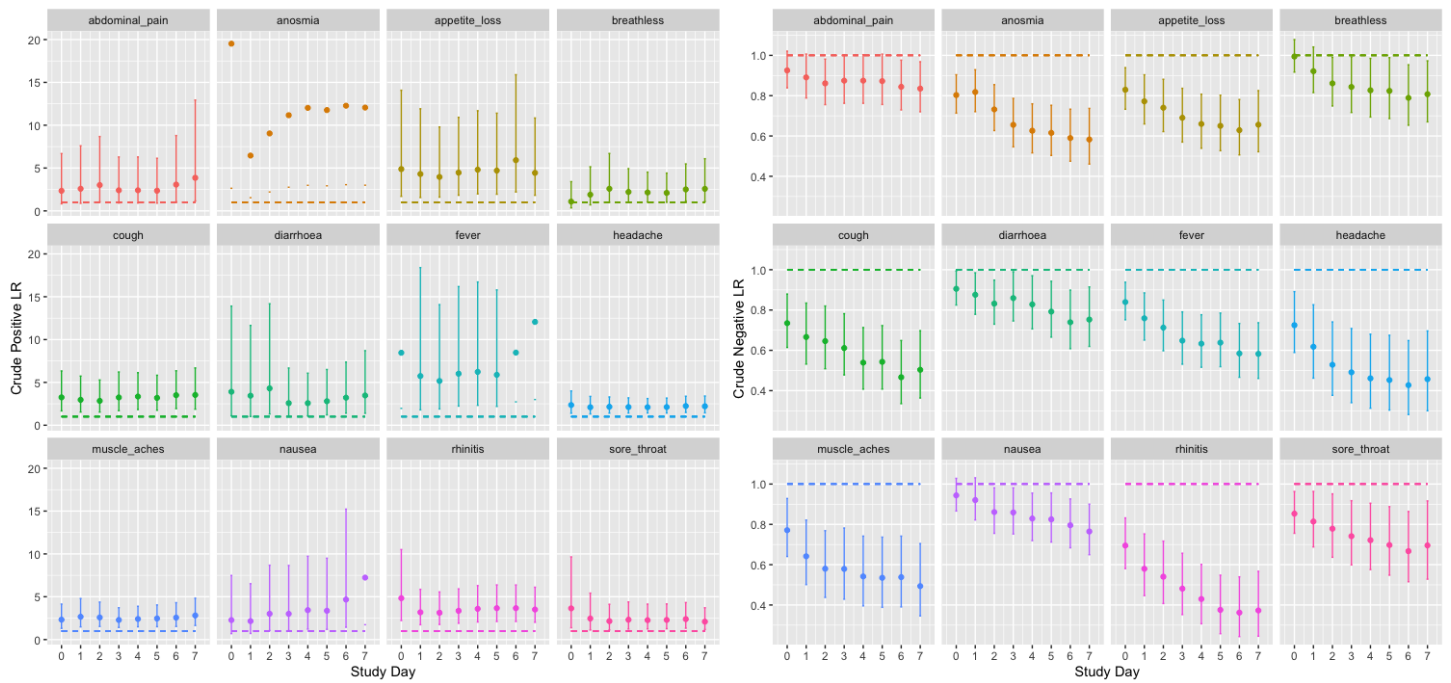

**S12: Adjusted Likelihood Ratios for the canonical symptoms when used in combination. LR**

= likelihood ratio.

| Study Day | Symptom | Adjusted Positive LR | Adjusted Negative LR | Study Day | Symptom | Adjusted Positive LR | Adjusted Negative LR |
|-----------|---------|----------------------|----------------------|-----------|---------|----------------------|----------------------|
| 0         | fever   | 3.55                 | 0.9                  | 4         | fever   | 3.87                 | 0.71                 |
|           | cough   | 1.53                 | 0.89                 |           | cough   | 1.33                 | 0.86                 |
|           | anosmia | 10.84                | 0.84                 |           | anosmia | 7.38                 | 0.69                 |
| 1         | fever   | 3.53                 | 0.82                 | 5         | fever   | 3.87                 | 0.71                 |
|           | cough   | 1.83                 | 0.8                  |           | cough   | 1.31                 | 0.87                 |
|           | anosmia | 3.36                 | 0.88                 |           | anosmia | 7.87                 | 0.67                 |
| 2         | fever   | 3.18                 | 0.79                 | 6         | fever   | 5.67                 | 0.65                 |
|           | cough   | 1.63                 | 0.81                 |           | cough   | 1.36                 | 0.83                 |
|           | anosmia | 4.97                 | 0.8                  |           | anosmia | 8.06                 | 0.64                 |
| 3         | fever   | 3.68                 | 0.73                 | 7         | fever   | 6.83                 | 0.66                 |
|           | cough   | 1.48                 | 0.85                 |           | cough   | 1.31                 | 0.86                 |
|           | anosmia | 6.53                 | 0.72                 |           | anosmia | 7.04                 | 0.65                 |

**S13 (overleaf): Sensitivity, specificity and Number-Needed-to-Test by day since exposure**

**for broadened case definitions.** Participants were excluded from this analysis if the date of exposure (index symptom onset for household contacts) was unknown. The 4 ‘early predictor’ (EP) symptoms (muscle aches, headache, sore throat, appetite loss) were combined individually with the canonical symptoms (CS) using an “OR” operator, for example *fever OR cough OR anosmia OR headache* (S13A), as well as together in a list using an “at least” operator, for example *fever OR cough OR anosmia OR more than 2 of muscle aches, headache, sore throat, appetite loss* (S13B) as described in Box 1 (main text).

Diagnostic performance was evaluated for each case definition against a serial PCR reference standard in the test dataset. The increase in TP and FP compared to the CS (*fever OR cough OR anosmia*) was measured. Number needed to test was calculated (number of false positives for every true positive plus 1). The Clopper-Pearson interval was used to calculate confidence intervals for proportions. [Click or tap here to enter text.](#) The data in this table are visualised in figure 4 in the main text. TP = true positive, FN = false negative, TN = true negative, FP = false positive, c.f. = compared to, Pos LR = positive likelihood ratio, Neg LR = Negative likelihood ratio, upper.ci = upper 95% confidence interval, lower.ci = lower 95% confidence interval.

**S13A: "OR rule" decision tools**

| Decision Tool                  | Days post exposure | TP | FN | Increase in TP | Sensitivity | upper.ci | lower.ci | TN  | FP | Increase in FP | Specificity | upper.ci | lower.ci | NNT  |
|--------------------------------|--------------------|----|----|----------------|-------------|----------|----------|-----|----|----------------|-------------|----------|----------|------|
| fever OR cough OR anosmia (CS) | 0                  | 17 | 74 | NA             | 0.19        | 0.28     | 0.11     | 260 | 4  | NA             | 0.98        | 1.00     | 0.96     | 1.24 |
|                                | 1                  | 24 | 67 | NA             | 0.26        | 0.37     | 0.18     | 256 | 8  | NA             | 0.97        | 0.99     | 0.94     | 1.33 |
|                                | 2                  | 32 | 59 | NA             | 0.35        | 0.46     | 0.25     | 251 | 13 | NA             | 0.95        | 0.97     | 0.92     | 1.41 |
|                                | 3                  | 38 | 53 | NA             | 0.42        | 0.53     | 0.32     | 243 | 21 | NA             | 0.92        | 0.95     | 0.88     | 1.55 |
|                                | 4                  | 42 | 49 | NA             | 0.46        | 0.57     | 0.36     | 237 | 27 | NA             | 0.90        | 0.93     | 0.85     | 1.64 |
|                                | 5                  | 49 | 42 | NA             | 0.54        | 0.64     | 0.43     | 234 | 30 | NA             | 0.89        | 0.92     | 0.84     | 1.61 |
|                                | 6                  | 55 | 36 | NA             | 0.60        | 0.71     | 0.50     | 233 | 31 | NA             | 0.88        | 0.92     | 0.84     | 1.56 |
|                                | 7                  | 58 | 33 | NA             | 0.64        | 0.74     | 0.53     | 231 | 33 | NA             | 0.88        | 0.91     | 0.83     | 1.57 |
|                                | 8                  | 62 | 29 | NA             | 0.68        | 0.78     | 0.58     | 230 | 34 | NA             | 0.87        | 0.91     | 0.82     | 1.55 |
|                                | 9                  | 63 | 28 | NA             | 0.69        | 0.78     | 0.59     | 230 | 34 | NA             | 0.87        | 0.91     | 0.82     | 1.54 |
| 10                             | 64                 | 27 | NA | 0.70           | 0.79        | 0.60     | 230      | 34  | NA | 0.87           | 0.91        | 0.82     | 1.53     |      |
| CS or muscle aches             | 0                  | 18 | 73 | 1              | 0.20        | 0.29     | 0.12     | 258 | 6  | 2              | 0.98        | 0.99     | 0.95     | 1.33 |
|                                | 1                  | 27 | 64 | 3              | 0.30        | 0.40     | 0.21     | 253 | 11 | 3              | 0.96        | 0.98     | 0.93     | 1.41 |
|                                | 2                  | 37 | 54 | 5              | 0.41        | 0.51     | 0.30     | 247 | 17 | 4              | 0.94        | 0.96     | 0.90     | 1.46 |
|                                | 3                  | 44 | 47 | 6              | 0.48        | 0.59     | 0.38     | 237 | 27 | 6              | 0.90        | 0.93     | 0.85     | 1.61 |
|                                | 4                  | 48 | 43 | 6              | 0.53        | 0.63     | 0.42     | 230 | 34 | 7              | 0.87        | 0.91     | 0.82     | 1.71 |
|                                | 5                  | 54 | 37 | 5              | 0.59        | 0.70     | 0.49     | 226 | 38 | 8              | 0.86        | 0.90     | 0.81     | 1.70 |
|                                | 6                  | 59 | 32 | 4              | 0.65        | 0.75     | 0.54     | 222 | 42 | 11             | 0.84        | 0.88     | 0.79     | 1.71 |
|                                | 7                  | 61 | 30 | 3              | 0.67        | 0.77     | 0.56     | 220 | 44 | 11             | 0.83        | 0.88     | 0.78     | 1.72 |
|                                | 8                  | 65 | 26 | 3              | 0.71        | 0.80     | 0.61     | 219 | 45 | 11             | 0.83        | 0.87     | 0.78     | 1.69 |
|                                | 9                  | 66 | 25 | 3              | 0.73        | 0.81     | 0.62     | 219 | 45 | 11             | 0.83        | 0.87     | 0.78     | 1.68 |
| 10                             | 66                 | 25 | 2  | 0.73           | 0.81        | 0.62     | 219      | 45  | 11 | 0.83           | 0.87        | 0.78     | 1.68     |      |
| CS or headache                 | 0                  | 22 | 69 | 5              | 0.24        | 0.34     | 0.16     | 254 | 10 | 6              | 0.96        | 0.98     | 0.93     | 1.45 |
|                                | 1                  | 33 | 58 | 9              | 0.36        | 0.47     | 0.26     | 243 | 21 | 13             | 0.92        | 0.95     | 0.88     | 1.64 |
|                                | 2                  | 42 | 49 | 10             | 0.46        | 0.57     | 0.36     | 229 | 35 | 22             | 0.87        | 0.91     | 0.82     | 1.83 |
|                                | 3                  | 49 | 42 | 11             | 0.54        | 0.64     | 0.43     | 215 | 49 | 28             | 0.81        | 0.86     | 0.76     | 2.00 |
|                                | 4                  | 57 | 34 | 15             | 0.63        | 0.73     | 0.52     | 205 | 59 | 32             | 0.78        | 0.83     | 0.72     | 2.04 |
|                                | 5                  | 61 | 30 | 12             | 0.67        | 0.77     | 0.56     | 194 | 70 | 40             | 0.73        | 0.79     | 0.68     | 2.15 |
|                                | 6                  | 66 | 25 | 11             | 0.73        | 0.81     | 0.62     | 189 | 75 | 44             | 0.72        | 0.77     | 0.66     | 2.14 |
|                                | 7                  | 70 | 21 | 12             | 0.77        | 0.85     | 0.67     | 187 | 77 | 44             | 0.71        | 0.76     | 0.65     | 2.10 |
|                                | 8                  | 73 | 18 | 11             | 0.80        | 0.88     | 0.71     | 185 | 79 | 45             | 0.70        | 0.76     | 0.64     | 2.08 |
|                                | 9                  | 74 | 17 | 11             | 0.81        | 0.89     | 0.72     | 184 | 80 | 46             | 0.70        | 0.75     | 0.64     | 2.08 |
| 10                             | 74                 | 17 | 10 | 0.81           | 0.89        | 0.72     | 184      | 80  | 46 | 0.70           | 0.75        | 0.64     | 2.08     |      |
| CS or sore throat              | 0                  | 20 | 71 | 3              | 0.22        | 0.32     | 0.14     | 257 | 7  | 3              | 0.97        | 0.99     | 0.95     | 1.35 |
|                                | 1                  | 28 | 63 | 4              | 0.31        | 0.41     | 0.22     | 252 | 12 | 4              | 0.95        | 0.98     | 0.92     | 1.43 |
|                                | 2                  | 37 | 54 | 5              | 0.41        | 0.51     | 0.30     | 246 | 18 | 5              | 0.93        | 0.96     | 0.89     | 1.49 |
|                                | 3                  | 43 | 48 | 5              | 0.47        | 0.58     | 0.37     | 236 | 28 | 7              | 0.89        | 0.93     | 0.85     | 1.65 |
|                                | 4                  | 50 | 41 | 8              | 0.55        | 0.65     | 0.44     | 229 | 35 | 8              | 0.87        | 0.91     | 0.82     | 1.70 |
|                                | 5                  | 59 | 32 | 10             | 0.65        | 0.75     | 0.54     | 219 | 45 | 15             | 0.83        | 0.87     | 0.78     | 1.76 |
|                                | 6                  | 64 | 27 | 9              | 0.70        | 0.79     | 0.60     | 216 | 48 | 17             | 0.82        | 0.86     | 0.77     | 1.75 |
|                                | 7                  | 69 | 22 | 11             | 0.76        | 0.84     | 0.66     | 212 | 52 | 19             | 0.80        | 0.85     | 0.75     | 1.75 |
|                                | 8                  | 71 | 20 | 9              | 0.78        | 0.86     | 0.68     | 210 | 54 | 20             | 0.80        | 0.84     | 0.74     | 1.76 |
|                                | 9                  | 71 | 20 | 8              | 0.78        | 0.86     | 0.68     | 208 | 56 | 22             | 0.79        | 0.84     | 0.73     | 1.79 |
| 10                             | 71                 | 20 | 7  | 0.78           | 0.86        | 0.68     | 208      | 56  | 22 | 0.79           | 0.84        | 0.73     | 1.79     |      |
| CS or appetite loss            | 0                  | 18 | 73 | 1              | 0.20        | 0.29     | 0.12     | 259 | 5  | 1              | 0.98        | 0.99     | 0.96     | 1.28 |
|                                | 1                  | 26 | 65 | 2              | 0.29        | 0.39     | 0.20     | 254 | 10 | 2              | 0.96        | 0.98     | 0.93     | 1.38 |
|                                | 2                  | 34 | 57 | 2              | 0.37        | 0.48     | 0.27     | 249 | 15 | 2              | 0.94        | 0.97     | 0.91     | 1.44 |
|                                | 3                  | 41 | 50 | 3              | 0.45        | 0.56     | 0.35     | 240 | 24 | 3              | 0.91        | 0.94     | 0.87     | 1.59 |
|                                | 4                  | 45 | 46 | 3              | 0.49        | 0.60     | 0.39     | 232 | 32 | 5              | 0.88        | 0.92     | 0.83     | 1.71 |
|                                | 5                  | 51 | 40 | 2              | 0.56        | 0.66     | 0.45     | 227 | 37 | 7              | 0.86        | 0.90     | 0.81     | 1.73 |
|                                | 6                  | 57 | 34 | 2              | 0.63        | 0.73     | 0.52     | 225 | 39 | 8              | 0.85        | 0.89     | 0.80     | 1.68 |
|                                | 7                  | 60 | 31 | 2              | 0.66        | 0.76     | 0.55     | 223 | 41 | 8              | 0.84        | 0.89     | 0.80     | 1.68 |
|                                | 8                  | 65 | 26 | 3              | 0.71        | 0.80     | 0.61     | 222 | 42 | 8              | 0.84        | 0.88     | 0.79     | 1.65 |
|                                | 9                  | 66 | 25 | 3              | 0.73        | 0.81     | 0.62     | 222 | 42 | 8              | 0.84        | 0.88     | 0.79     | 1.64 |
| 10                             | 66                 | 25 | 2  | 0.73           | 0.81        | 0.62     | 222      | 42  | 8  | 0.84           | 0.88        | 0.79     | 1.64     |      |



**S13B: “At least” decision tools**

| Decision Tool                  | Days post exposure | TP | FN | Increase in TP | Sensitivity | upper.ci | lower.ci | TN  | FP | Increase in FP | Specificity | upper.ci | lower.ci | NNT  |
|--------------------------------|--------------------|----|----|----------------|-------------|----------|----------|-----|----|----------------|-------------|----------|----------|------|
| fever OR cough OR anosmia (CS) | 0                  | 17 | 74 | NA             | 0.19        | 0.28     | 0.11     | 260 | 4  | NA             | 0.98        | 1.00     | 0.96     | 1.24 |
|                                | 1                  | 24 | 67 | NA             | 0.26        | 0.37     | 0.18     | 256 | 8  | NA             | 0.97        | 0.99     | 0.94     | 1.33 |
|                                | 2                  | 32 | 59 | NA             | 0.35        | 0.46     | 0.25     | 251 | 13 | NA             | 0.95        | 0.97     | 0.92     | 1.41 |
|                                | 3                  | 38 | 53 | NA             | 0.42        | 0.53     | 0.32     | 243 | 21 | NA             | 0.92        | 0.95     | 0.88     | 1.55 |
|                                | 4                  | 42 | 49 | NA             | 0.46        | 0.57     | 0.36     | 237 | 27 | NA             | 0.90        | 0.93     | 0.85     | 1.64 |
|                                | 5                  | 49 | 42 | NA             | 0.54        | 0.64     | 0.43     | 234 | 30 | NA             | 0.89        | 0.92     | 0.84     | 1.61 |
|                                | 6                  | 55 | 36 | NA             | 0.60        | 0.71     | 0.50     | 233 | 31 | NA             | 0.88        | 0.92     | 0.84     | 1.56 |
|                                | 7                  | 58 | 33 | NA             | 0.64        | 0.74     | 0.53     | 231 | 33 | NA             | 0.88        | 0.91     | 0.83     | 1.57 |
|                                | 8                  | 62 | 29 | NA             | 0.68        | 0.78     | 0.58     | 230 | 34 | NA             | 0.87        | 0.91     | 0.82     | 1.55 |
|                                | 9                  | 63 | 28 | NA             | 0.69        | 0.78     | 0.59     | 230 | 34 | NA             | 0.87        | 0.91     | 0.82     | 1.54 |
| 10                             | 64                 | 27 | NA | 0.70           | 0.79        | 0.60     | 230      | 34  | NA | 0.87           | 0.91        | 0.82     | 1.53     |      |
| ≥1 of the CS, or ≥1 of the EP  | 0                  | 22 | 69 | 5              | 0.24        | 0.34     | 0.16     | 251 | 13 | 9              | 0.95        | 0.97     | 0.92     | 1.59 |
|                                | 1                  | 34 | 57 | 10             | 0.37        | 0.48     | 0.27     | 240 | 24 | 16             | 0.91        | 0.94     | 0.87     | 1.71 |
|                                | 2                  | 45 | 46 | 13             | 0.49        | 0.60     | 0.39     | 225 | 39 | 26             | 0.85        | 0.89     | 0.80     | 1.87 |
|                                | 3                  | 51 | 40 | 13             | 0.56        | 0.66     | 0.45     | 209 | 55 | 34             | 0.79        | 0.84     | 0.74     | 2.08 |
|                                | 4                  | 60 | 31 | 18             | 0.66        | 0.76     | 0.55     | 196 | 68 | 41             | 0.74        | 0.79     | 0.69     | 2.13 |
|                                | 5                  | 66 | 25 | 17             | 0.73        | 0.81     | 0.62     | 182 | 82 | 52             | 0.69        | 0.74     | 0.63     | 2.24 |
|                                | 6                  | 70 | 21 | 15             | 0.77        | 0.85     | 0.67     | 176 | 88 | 57             | 0.67        | 0.72     | 0.61     | 2.26 |
|                                | 7                  | 74 | 17 | 16             | 0.81        | 0.89     | 0.72     | 173 | 91 | 58             | 0.66        | 0.71     | 0.59     | 2.23 |
|                                | 8                  | 76 | 15 | 14             | 0.84        | 0.90     | 0.74     | 171 | 93 | 59             | 0.65        | 0.71     | 0.59     | 2.22 |
|                                | 9                  | 76 | 15 | 13             | 0.84        | 0.90     | 0.74     | 169 | 95 | 61             | 0.64        | 0.70     | 0.58     | 2.25 |
| 10                             | 76                 | 15 | 12 | 0.84           | 0.90        | 0.74     | 169      | 95  | 61 | 0.64           | 0.70        | 0.58     | 2.25     |      |
| ≥1 of the CS, or ≥2 of the EP  | 0                  | 21 | 70 | 4              | 0.23        | 0.33     | 0.15     | 258 | 6  | 2              | 0.98        | 0.99     | 0.95     | 1.29 |
|                                | 1                  | 30 | 61 | 6              | 0.33        | 0.44     | 0.23     | 251 | 13 | 5              | 0.95        | 0.97     | 0.92     | 1.43 |
|                                | 2                  | 39 | 52 | 7              | 0.43        | 0.54     | 0.33     | 245 | 19 | 6              | 0.93        | 0.96     | 0.89     | 1.49 |
|                                | 3                  | 47 | 44 | 9              | 0.52        | 0.62     | 0.41     | 234 | 30 | 9              | 0.89        | 0.92     | 0.84     | 1.64 |
|                                | 4                  | 52 | 39 | 10             | 0.57        | 0.67     | 0.46     | 228 | 36 | 9              | 0.86        | 0.90     | 0.82     | 1.69 |
|                                | 5                  | 58 | 33 | 9              | 0.64        | 0.74     | 0.53     | 219 | 45 | 15             | 0.83        | 0.87     | 0.78     | 1.78 |
|                                | 6                  | 63 | 28 | 8              | 0.69        | 0.78     | 0.59     | 213 | 51 | 20             | 0.81        | 0.85     | 0.75     | 1.81 |
|                                | 7                  | 68 | 23 | 10             | 0.75        | 0.83     | 0.65     | 210 | 54 | 21             | 0.80        | 0.84     | 0.74     | 1.79 |
|                                | 8                  | 70 | 21 | 8              | 0.77        | 0.85     | 0.67     | 209 | 55 | 21             | 0.79        | 0.84     | 0.74     | 1.79 |
|                                | 9                  | 71 | 20 | 8              | 0.78        | 0.86     | 0.68     | 209 | 55 | 21             | 0.79        | 0.84     | 0.74     | 1.77 |
| 10                             | 71                 | 20 | 7  | 0.78           | 0.86        | 0.68     | 209      | 55  | 21 | 0.79           | 0.84        | 0.74     | 1.77     |      |
| ≥1 of the CS, or ≥3 of the EP  | 0                  | 18 | 73 | 1              | 0.20        | 0.29     | 0.12     | 259 | 5  | 1              | 0.98        | 0.99     | 0.96     | 1.28 |
|                                | 1                  | 26 | 65 | 2              | 0.29        | 0.39     | 0.20     | 255 | 9  | 1              | 0.97        | 0.98     | 0.94     | 1.35 |
|                                | 2                  | 34 | 57 | 2              | 0.37        | 0.48     | 0.27     | 250 | 14 | 1              | 0.95        | 0.97     | 0.91     | 1.41 |
|                                | 3                  | 41 | 50 | 3              | 0.45        | 0.56     | 0.35     | 242 | 22 | 1              | 0.92        | 0.95     | 0.88     | 1.54 |
|                                | 4                  | 46 | 45 | 4              | 0.51        | 0.61     | 0.40     | 235 | 29 | 2              | 0.89        | 0.93     | 0.85     | 1.63 |
|                                | 5                  | 52 | 39 | 3              | 0.57        | 0.67     | 0.46     | 231 | 33 | 3              | 0.88        | 0.91     | 0.83     | 1.63 |
|                                | 6                  | 58 | 33 | 3              | 0.64        | 0.74     | 0.53     | 230 | 34 | 3              | 0.87        | 0.91     | 0.82     | 1.59 |
|                                | 7                  | 60 | 31 | 2              | 0.66        | 0.76     | 0.55     | 228 | 36 | 3              | 0.86        | 0.90     | 0.82     | 1.60 |
|                                | 8                  | 65 | 26 | 3              | 0.71        | 0.80     | 0.61     | 226 | 38 | 4              | 0.86        | 0.90     | 0.81     | 1.58 |
|                                | 9                  | 66 | 25 | 3              | 0.73        | 0.81     | 0.62     | 225 | 39 | 5              | 0.85        | 0.89     | 0.80     | 1.59 |
| 10                             | 66                 | 25 | 2  | 0.73           | 0.81        | 0.62     | 225      | 39  | 5  | 0.85           | 0.89        | 0.80     | 1.59     |      |
| ≥1 of the CS, or ≥4 of the EP  | 0                  | 17 | 74 | 0              | 0.19        | 0.28     | 0.11     | 260 | 4  | 0              | 0.98        | 1.00     | 0.96     | 1.24 |
|                                | 1                  | 24 | 67 | 0              | 0.26        | 0.37     | 0.18     | 256 | 8  | 0              | 0.97        | 0.99     | 0.94     | 1.33 |
|                                | 2                  | 32 | 59 | 0              | 0.35        | 0.46     | 0.25     | 251 | 13 | 0              | 0.95        | 0.97     | 0.92     | 1.41 |
|                                | 3                  | 38 | 53 | 0              | 0.42        | 0.53     | 0.32     | 243 | 21 | 0              | 0.92        | 0.95     | 0.88     | 1.55 |
|                                | 4                  | 42 | 49 | 0              | 0.46        | 0.57     | 0.36     | 237 | 27 | 0              | 0.90        | 0.93     | 0.85     | 1.64 |
|                                | 5                  | 49 | 42 | 0              | 0.54        | 0.64     | 0.43     | 234 | 30 | 0              | 0.89        | 0.92     | 0.84     | 1.61 |
|                                | 6                  | 55 | 36 | 0              | 0.60        | 0.71     | 0.50     | 233 | 31 | 0              | 0.88        | 0.92     | 0.84     | 1.56 |
|                                | 7                  | 58 | 33 | 0              | 0.64        | 0.74     | 0.53     | 231 | 33 | 0              | 0.88        | 0.91     | 0.83     | 1.57 |
|                                | 8                  | 63 | 28 | 1              | 0.69        | 0.78     | 0.59     | 230 | 34 | 0              | 0.87        | 0.91     | 0.82     | 1.54 |
|                                | 9                  | 64 | 27 | 1              | 0.70        | 0.79     | 0.60     | 230 | 34 | 0              | 0.87        | 0.91     | 0.82     | 1.53 |
| 10                             | 64                 | 27 | 0  | 0.70           | 0.79        | 0.60     | 230      | 34  | 0  | 0.87           | 0.91        | 0.82     | 1.53     |      |

**S14 (overleaf): Life-tables for time-to-event analysis describing time in days from exposure until participants were positively identified by a case definition.** Easily comprehensible case definitions containing the canonical symptoms (CS): fever, cough and anosmia, and the early-predictors (EP): headache, sore throat, muscle aches and appetite loss were constructed as described in Box 1 (main text). The number of participants to whom the case definition was applied at each time-point is given ('at risk'). The numbers of participants identified positively by the case definition ('identified'), and the number of participants whose study diary ended ('lost') are given for each time-point. The median, 25<sup>th</sup> and 75<sup>th</sup> percentile of the time till positive identification by each case definition in days post exposure is given for PCR-positive and PCR-negative participants (also shown in Table 2, main text). Where participants were identified at enrolment, this value is 0 representing study day 0. If 25% of participants were not identified by the case definition, the value is "Never". Rarely, symptoms were reported at enrolment without an onset date. We imputed onset dates for these symptoms using the median number of days pre-enrolment (maximum 2 participants [0.55%] for rhinitis). TP = true positive, FN = false negative, TN = true negative, FP = false positive.

| A - PCR-positive    |                   | Time Period (Days since exposure) |    |    |    |    |    |    |    |    |    |    | Time to Detection |      |
|---------------------|-------------------|-----------------------------------|----|----|----|----|----|----|----|----|----|----|-------------------|------|
|                     |                   | 0                                 | 1  | 2  | 3  | 4  | 5  | 6  | 7  | 8  | 9  | 10 | %                 | Days |
| ≥1 of the CS...     | At Risk (TP + FN) | 91                                | 74 | 67 | 59 | 52 | 44 | 32 | 24 | 21 | 17 | 15 | 25                | 2    |
|                     | Identified (TP)   | 17                                | 7  | 8  | 6  | 4  | 7  | 6  | 3  | 4  | 1  | 1  | 50                | 6    |
|                     | Lost              | 0                                 | 0  | 0  | 1  | 4  | 5  | 2  | 0  | 0  | 1  | 0  | 70                | 10   |
| ...OR sore throat   | At Risk (TP + FN) | 91                                | 71 | 63 | 54 | 47 | 37 | 23 | 16 | 11 | 9  | 8  | 25                | 2    |
|                     | Identified (TP)   | 20                                | 8  | 9  | 6  | 7  | 9  | 5  | 5  | 2  | 0  | 0  | 50                | 5    |
|                     | Lost              | 0                                 | 0  | 0  | 1  | 3  | 5  | 2  | 0  | 0  | 1  | 0  | 75                | 8    |
| ... OR headache     | At Risk (TP + FN) | 91                                | 69 | 58 | 49 | 41 | 30 | 22 | 15 | 11 | 8  | 6  | 25                | 2    |
|                     | Identified (TP)   | 22                                | 11 | 9  | 7  | 8  | 4  | 5  | 4  | 3  | 1  | 0  | 50                | 4    |
|                     | Lost              | 0                                 | 0  | 0  | 1  | 3  | 4  | 2  | 0  | 0  | 1  | 0  | 75                | 7    |
| ...OR muscle aches  | At Risk (TP + FN) | 91                                | 73 | 64 | 54 | 46 | 38 | 27 | 20 | 18 | 14 | 13 | 25                | 2    |
|                     | Identified (TP)   | 18                                | 9  | 10 | 7  | 4  | 6  | 5  | 2  | 4  | 1  | 0  | 50                | 5    |
|                     | Lost              | 0                                 | 0  | 0  | 1  | 4  | 5  | 2  | 0  | 0  | 0  | 0  | 75                | 9    |
| ...OR appetite loss | At Risk (TP + FN) | 91                                | 73 | 65 | 57 | 49 | 41 | 30 | 22 | 19 | 14 | 12 | 25                | 2    |
|                     | Identified (TP)   | 18                                | 8  | 8  | 7  | 4  | 6  | 6  | 3  | 5  | 1  | 0  | 50                | 6    |
|                     | Lost              | 0                                 | 0  | 0  | 1  | 4  | 5  | 2  | 0  | 0  | 1  | 0  | 75                | 9    |
| ...or ≥1 of the EP  | At Risk (TP + FN) | 91                                | 69 | 57 | 46 | 39 | 27 | 17 | 11 | 7  | 5  | 5  | 25                | 2    |
|                     | Identified (TP)   | 22                                | 12 | 11 | 6  | 9  | 6  | 4  | 4  | 2  | 0  | 0  | 50                | 4    |
|                     | Lost              | 0                                 | 0  | 0  | 1  | 3  | 4  | 2  | 0  | 0  | 0  | 0  | 75                | 7    |
| ...or ≥2 of the EP  | At Risk (TP + FN) | 91                                | 70 | 61 | 52 | 43 | 35 | 24 | 17 | 12 | 10 | 8  | 25                | 2    |
|                     | Identified (TP)   | 21                                | 9  | 9  | 8  | 5  | 6  | 5  | 5  | 2  | 1  | 0  | 50                | 4    |
|                     | Lost              | 0                                 | 0  | 0  | 1  | 3  | 5  | 2  | 0  | 0  | 1  | 0  | 75                | 8    |
| ...or ≥3 of the EP  | At Risk (TP + FN) | 91                                | 73 | 65 | 57 | 49 | 40 | 29 | 21 | 19 | 14 | 12 | 25                | 2    |
|                     | Identified (TP)   | 18                                | 8  | 8  | 7  | 5  | 6  | 6  | 2  | 5  | 1  | 0  | 50                | 5    |
|                     | Lost              | 0                                 | 0  | 0  | 1  | 4  | 5  | 2  | 0  | 0  | 1  | 0  | 75                | 9    |
| ...or ≥4 of the EP  | At Risk (TP + FN) | 91                                | 74 | 67 | 59 | 52 | 44 | 32 | 24 | 21 | 16 | 14 | 25                | 2    |
|                     | Identified (TP)   | 17                                | 7  | 8  | 6  | 4  | 7  | 6  | 3  | 5  | 1  | 0  | 50                | 6    |
|                     | Lost              | 0                                 | 0  | 0  | 1  | 4  | 5  | 2  | 0  | 0  | 1  | 0  | 75                | 9    |

| B - PCR-negative    |                   | Time Period (Days since exposure) |     |     |     |     |     |     |     |     |     |     | Time to Detection |       |
|---------------------|-------------------|-----------------------------------|-----|-----|-----|-----|-----|-----|-----|-----|-----|-----|-------------------|-------|
|                     |                   | 0                                 | 1   | 2   | 3   | 4   | 5   | 6   | 7   | 8   | 9   | 10  | %                 | Days  |
| ≥1 of the CS...     | At Risk (TN + FP) | 264                               | 260 | 256 | 251 | 236 | 201 | 165 | 145 | 137 | 134 | 134 | 25                | never |
|                     | Identified (FP)   | 4                                 | 4   | 5   | 8   | 6   | 3   | 1   | 2   | 1   | 0   | 0   | 50                | never |
|                     | Lost              | 0                                 | 0   | 0   | 7   | 29  | 33  | 19  | 6   | 2   | 0   | 2   | 70                | never |
| ...OR sore throat   | At Risk (TN + FP) | 264                               | 257 | 252 | 246 | 229 | 194 | 152 | 131 | 121 | 117 | 115 | 25                | never |
|                     | Identified (FP)   | 7                                 | 5   | 6   | 10  | 7   | 10  | 3   | 4   | 2   | 2   | 0   | 50                | never |
|                     | Lost              | 0                                 | 0   | 0   | 7   | 28  | 32  | 18  | 6   | 2   | 0   | 2   | 75                | never |
| ... OR headache     | At Risk (TN + FP) | 264                               | 254 | 243 | 229 | 209 | 174 | 132 | 114 | 107 | 103 | 102 | 25                | 6     |
|                     | Identified (FP)   | 10                                | 11  | 14  | 14  | 10  | 11  | 5   | 2   | 2   | 1   | 0   | 50                | never |
|                     | Lost              | 0                                 | 0   | 0   | 6   | 25  | 31  | 13  | 5   | 2   | 0   | 2   | 75                | never |
| ...OR muscle aches  | At Risk (TN + FP) | 264                               | 258 | 253 | 247 | 230 | 195 | 158 | 138 | 131 | 128 | 128 | 25                | never |
|                     | Identified (FP)   | 6                                 | 5   | 6   | 10  | 7   | 4   | 4   | 2   | 1   | 0   | 0   | 50                | never |
|                     | Lost              | 0                                 | 0   | 0   | 7   | 28  | 33  | 16  | 5   | 2   | 0   | 2   | 75                | never |
| ...OR appetite loss | At Risk (TN + FP) | 264                               | 259 | 254 | 249 | 233 | 196 | 160 | 140 | 133 | 130 | 130 | 25                | never |
|                     | Identified (FP)   | 5                                 | 5   | 5   | 9   | 8   | 5   | 2   | 2   | 1   | 0   | 0   | 50                | never |
|                     | Lost              | 0                                 | 0   | 0   | 7   | 29  | 31  | 18  | 5   | 2   | 0   | 2   | 75                | never |
| ...or ≥1 of the EP  | At Risk (TN + FP) | 264                               | 251 | 240 | 225 | 203 | 167 | 124 | 105 | 98  | 94  | 92  | 25                | 5     |
|                     | Identified (FP)   | 13                                | 11  | 15  | 16  | 13  | 14  | 6   | 3   | 2   | 2   | 0   | 50                | never |
|                     | Lost              | 0                                 | 0   | 0   | 6   | 23  | 29  | 13  | 4   | 2   | 0   | 2   | 75                | never |
| ...or ≥2 of the EP  | At Risk (TN + FP) | 264                               | 258 | 251 | 245 | 227 | 192 | 151 | 130 | 122 | 119 | 119 | 25                | never |
|                     | Identified (FP)   | 6                                 | 7   | 6   | 11  | 6   | 9   | 6   | 3   | 1   | 0   | 0   | 50                | never |
|                     | Lost              | 0                                 | 0   | 0   | 7   | 29  | 32  | 15  | 5   | 2   | 0   | 2   | 75                | never |
| ...or ≥3 of the EP  | At Risk (TN + FP) | 264                               | 259 | 255 | 250 | 235 | 199 | 162 | 143 | 135 | 131 | 130 | 25                | never |
|                     | Identified (FP)   | 5                                 | 4   | 5   | 8   | 7   | 4   | 1   | 2   | 2   | 1   | 0   | 50                | never |
|                     | Lost              | 0                                 | 0   | 0   | 7   | 29  | 33  | 18  | 6   | 2   | 0   | 2   | 75                | never |
| ...or ≥4 of the EP  | At Risk (TN + FP) | 264                               | 260 | 256 | 251 | 236 | 201 | 165 | 145 | 137 | 134 | 134 | 25                | never |
|                     | Identified (FP)   | 4                                 | 4   | 5   | 8   | 6   | 3   | 1   | 2   | 1   | 0   | 0   | 50                | never |
|                     | Lost              | 0                                 | 0   | 0   | 7   | 29  | 33  | 19  | 6   | 2   | 0   | 2   | 75                | never |

### **S15 (overleaf): Comparison of proposed symptom criteria with international case**

**definitions.** The presence or absence of symptoms by each day post-exposure was used to calculate diagnostic sensitivity (panel A) and specificity (panel B) for different case definitions (cohort D, figure 1) against a serial PCR reference standard. We compared the canonical symptoms (CS), our proposed symptom criteria ( $\geq 1$  of the CS, or  $\geq 2$  of the EP) and international case definitions (S1, [main text references 8-12]). Where the precise wording of items in our symptom diaries (S2) did not correspond exactly with wording in international case definitions the closest approximation was chosen. In the WHO case definition, anorexia/nausea/vomiting is considered one symptom item whereas in our analysis loss of appetite and nausea/vomiting were considered two separate items, possibly overestimating sensitivity and underestimating specificity. In the US Centers for Disease Control case definition, chills and rigors are included as two separate symptom items as well as fever. In our analysis we considered fever as one variable, possibly underestimating sensitivity and overestimating specificity. The Clopper-Pearson interval was used to calculate 95% confidence intervals.

Kaplan-Meier plots were constructed showing time from exposure (index symptom onset for household-contacts) until positive identification by these symptom criteria in PCR-positive (panel C) and PCR-negative (panel D) contacts. The plot for the CS is shown in black. Rarely, symptoms were reported at enrolment without an onset date. We imputed onset dates for these symptoms by assuming the median number of days pre-enrolment (maximum 2 participants [0.55%] for rhinitis).

Legend:

- fever OR cough OR anosmia (CS)
- ✱ CS OR at least 2 of the Early Predictors
- ✱ WHO
- ✱ USA (CDC)
- ✱ France
- ✱ Spain

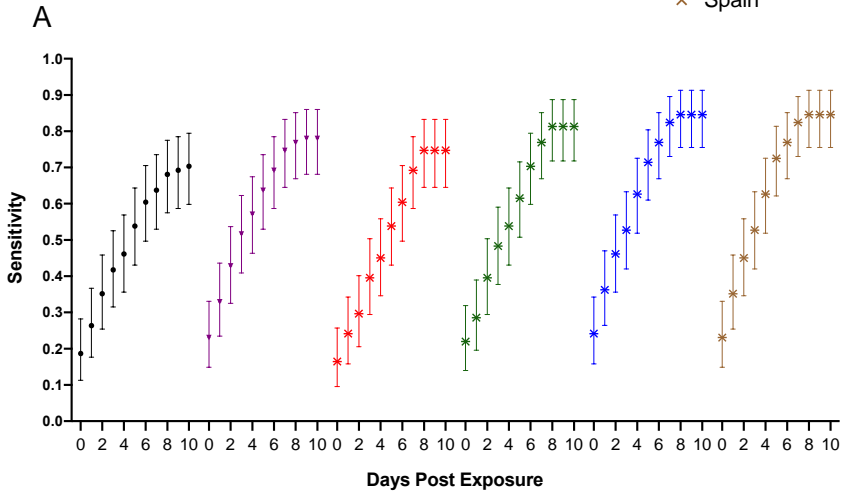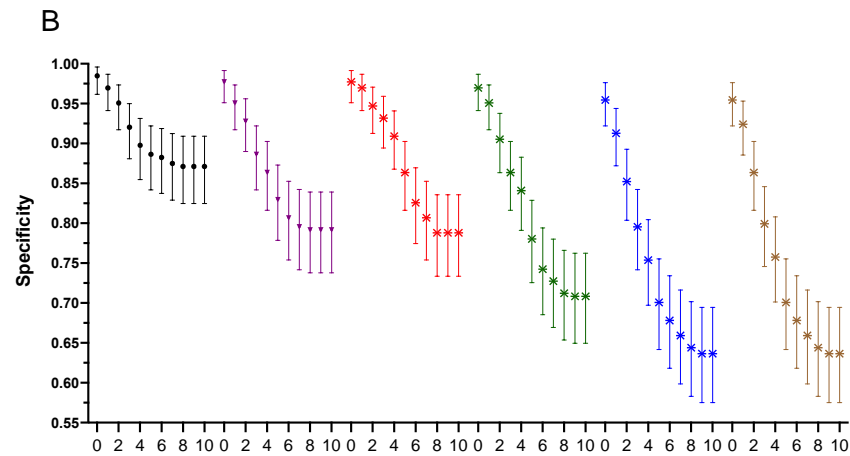

- UK (CS)**
- WHO**
- CS OR at least 2 of the Early Predictors**
- US CDC**
- France**
- Spain**

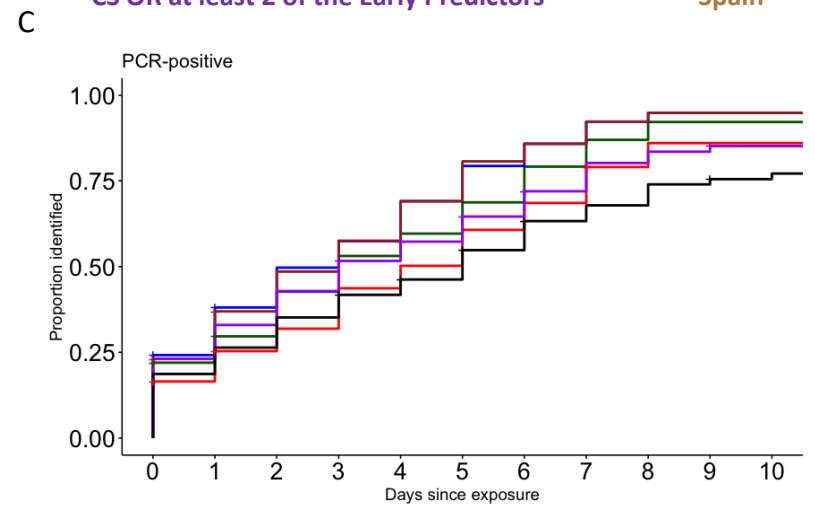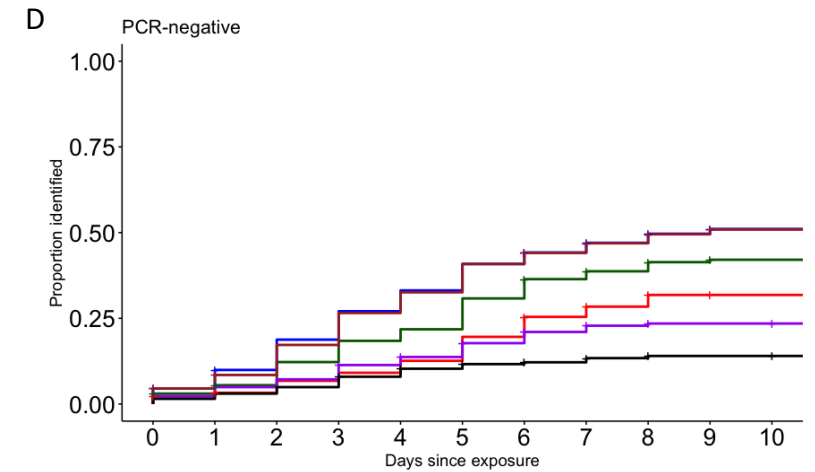

### S16: Leave-one-out analysis

Kaplan-Meier plots showing time from exposure until positive identification by different symptom criteria. The proportion of PCR-positive (left) and PCR-negative (right) participants who were positively identified by each case definition by each day following exposure (index symptom onset for household-contacts) is shown using a Kaplan-Meier plot. We compared the performance of the canonical symptoms (CS; fever OR cough OR anosmia; black line) with our proposed symptom criteria ( $\geq 1$  of the CS, or  $\geq 2$  of the EP; purple line). These data are also shown in figure 5 (main text) and life-tables presented in S14.

We performed a leave-one-out analysis to determine whether each of the 'early predictor' (EP) symptoms (headache, muscle aches, sore throat, appetite loss) were necessary within the proposed symptom criteria. Four new symptom criteria (each with one of the EPs left out) are applied (red, green, blue and brown lines) and compared to the proposed symptom criteria. HA=Headache, MA=muscle aches, ST= sore throat, AL=appetite loss.

**Legend:** CS  
CS OR at least 2 of the early predictors (HA, MA, AL, ST)  
CS OR at least 2 of MA, AL, ST  
CS OR at least 2 of HA, AL, ST  
CS OR at least 2 of HA, MA, ST  
CS OR at least 2 of HA, MA, AL

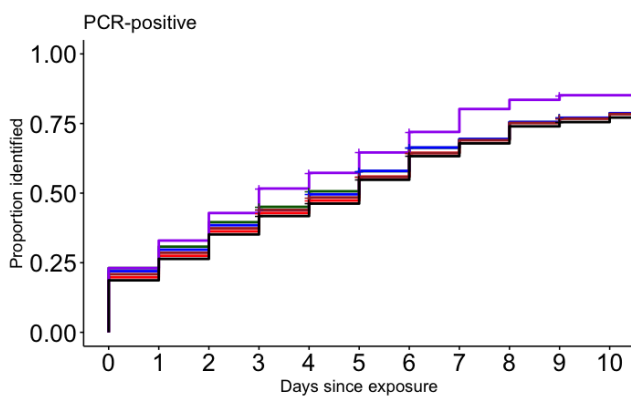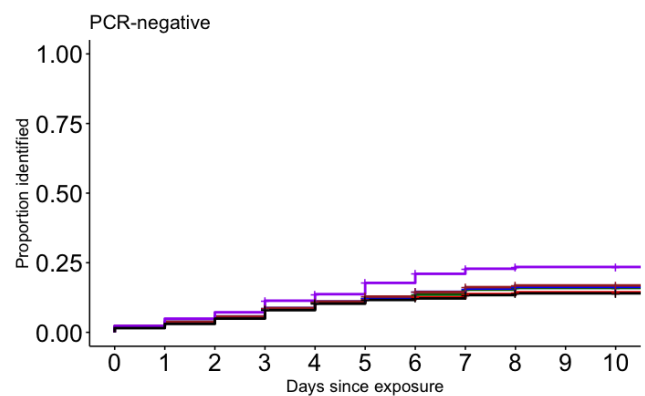

Supplement: ERJ-02308-2021.Supplement.pdf [file ERJ-02308-2021.Supplement.pdf]
